# Supplementary material for: Building bridges to operationalize One Health — A longitudinal two years’ AMR study in England using clinical and wastewater-based surveillance
Source: Research Square preprint supplement (doi:10.21203/rs.3.rs-4884554/v1), 2024-09-26
Supplement: Supplementary file 1 [file 6d23e21cb4ae4077eea6d9e8.docx]

*Building bridges to operationalise One Health* — *A longitudinal two years’ AMR study* *in England using clinical and wastewater-based surveillance approaches*

Like Xu1, Nicola Ceolotto1,2, Kishore Jagadeesan1, Richard Standerwick3, Megan Robertson3, Ruth Barden3, Helen Lambert4, Barbara Kasprzyk-Hordern1,2*

*1 Department of Chemistry, University of Bath, BA2 7AY, Bath UK*

*2 Institute for Sustainability, University of Bath, BA2 7AY, Bath UK*

*3 Wessex Water Service Ltd., Claverton Down, BA2 7WW, Bath, UK*

*4 Population Health Sciences, Bristol Medical School, University of Bristol, Bristol, BS8 1TH, UK*

* Email address: [b.kasprzyk-hordern@bath.ac.uk](mailto:b.kasprzyk-hordern@bath.ac.uk)

**Table of contents**

Figure S1. Site information of studied wastewater treatment plants (WWTPs)………….........p3

Figure S2. Yearly differences for PNDI and PNDP for individual antibiotics………………….p4

Figure S3. Yearly differences for ARGs and *16S rRNA*………………………………………….p4

Figure S4. Comparison of PNDI (Population-normalised daily intake) and PNDP (Population-normalised daily prescription) for individual antibiotics at four sampling sites…………...…p5-7

Figure S5. Heatmap showing the Spearman correlations between Covid infection rates and population-normalised daily intake (PNDI) of antibiotics.……………………..………………...p8

Figure S6. Heatmap showing the Spearman correlations between Covid infection rates and population-normalised daily prescription (PNDP) of antibiotics.………………………….…….p8

Figure S7. Heatmap showing the Spearman correlations between Covid infection rates and ARG abundance (normalisation to bacterial *16S rRNA*)…………………………………...……p9

Table S1. Target antimicrobials and abbreviations, ordered by drug classes………………p10

Table S2. Spearman correlations between PNDI and PNDP………………………………….p11

Table S3. Spearman correlations between antibiotics (PNDI & PNDP) and target genes…..p11

| 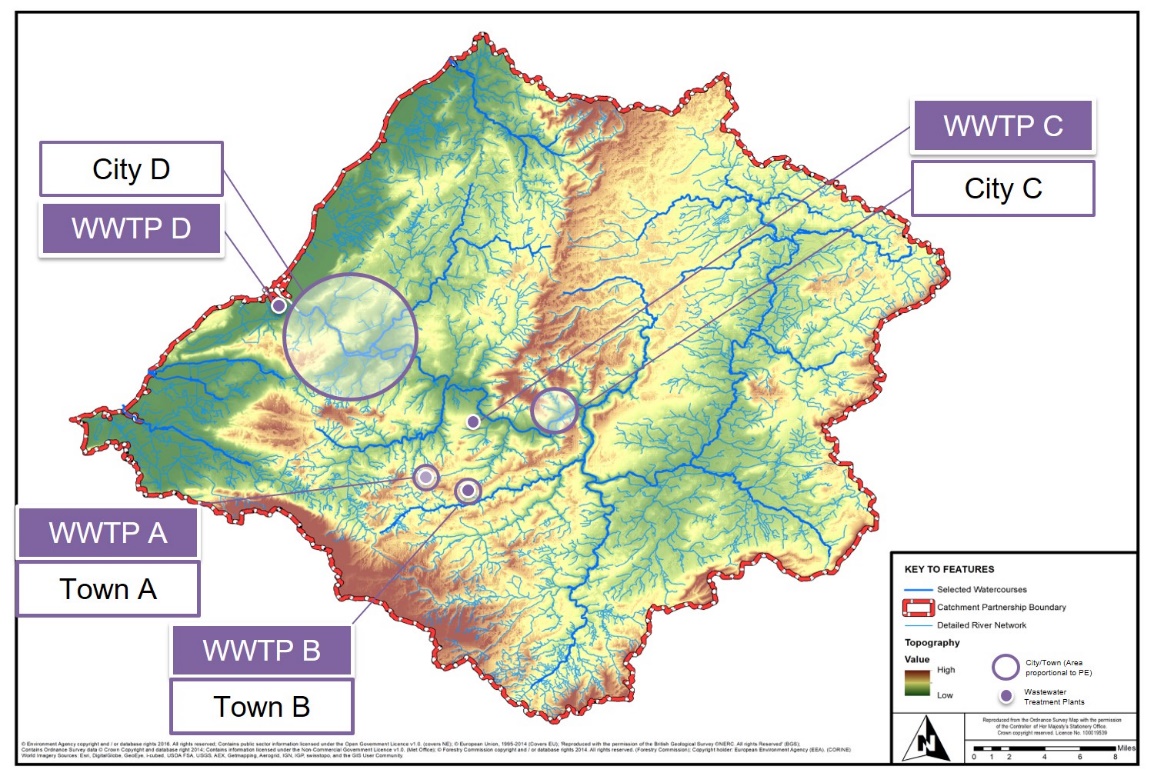 |
| --- |
| |  | **WWTP-A** | **WWTP-B** | **WWTP-C** | **WWTP-D** | | --- | --- | --- | --- | --- | | **Population - 2020** | 11,895 | 26,967 | 120,646 | 938,749 | | **Population - 2021** | 12,300 | 28,021 | 125,932 | 966,296 | | **Population - 2022** | 12,429 | 27,965 | 125,617 | 890,154 | | **No. of samples** | 150 | 159 | 144 | 137 | | **Type** | Domestic | Domestic | Domestic | Mixed | | **Industrial/hospital** | - | - | Hospital input | Industrial input | | **Served town/city** | Paulton (town) | Radstock (town) | Bath (city) | Bristol (city) | |
| Figure S1. Site information of studied wastewater treatment plants (WWTPs). |

| 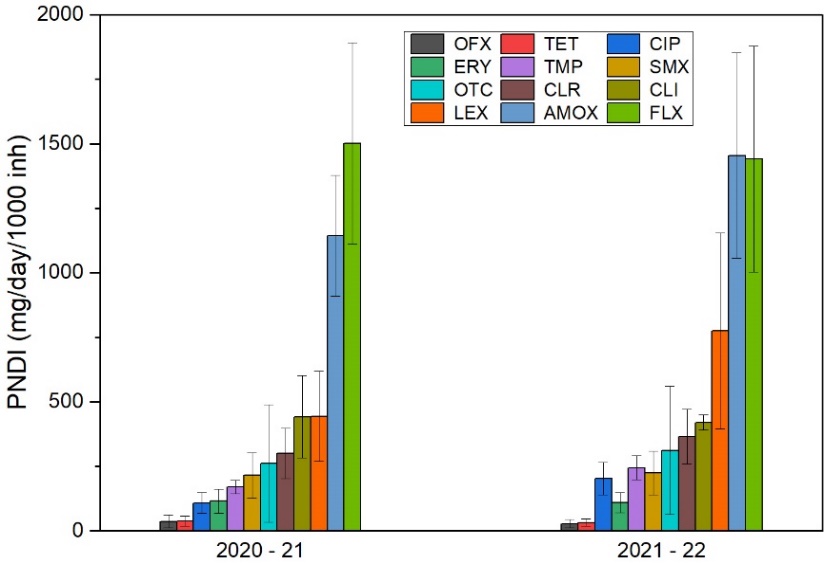 | 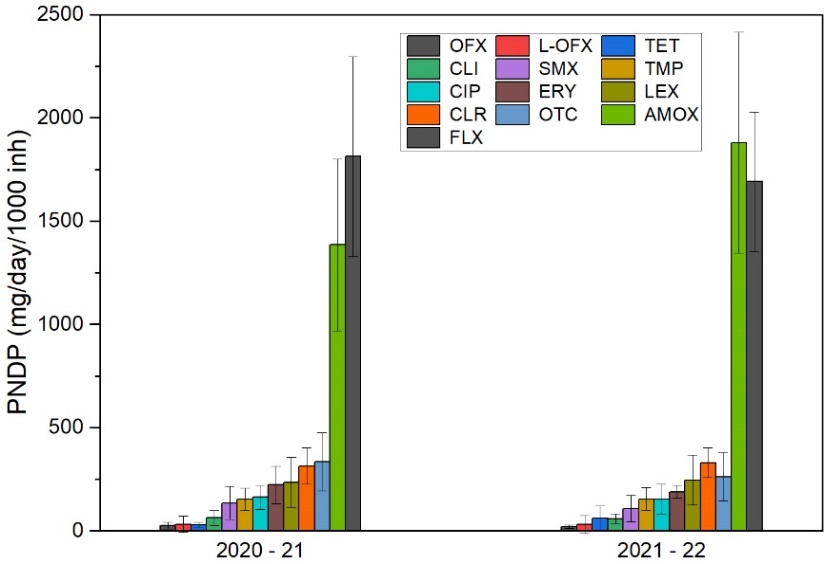 |
| --- | --- |
| Figure S2. Yearly differences for PNDI (population-normalised daily intake) and PNDP (population-normalised daily prescription)  for individual antibiotics. | |

| 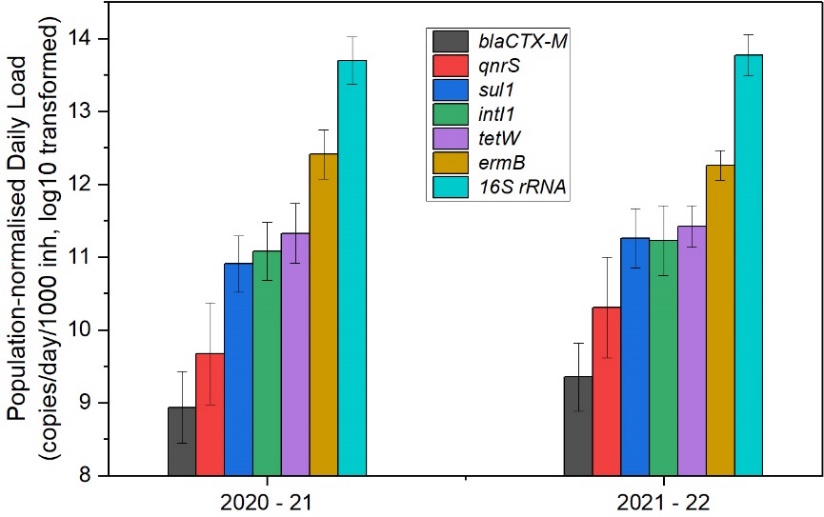 |
| --- |
| Figure S3. Yearly differences for ARGs and *16S rRNA* (expressed as population-normalised daily load, log10 transformed). |

| 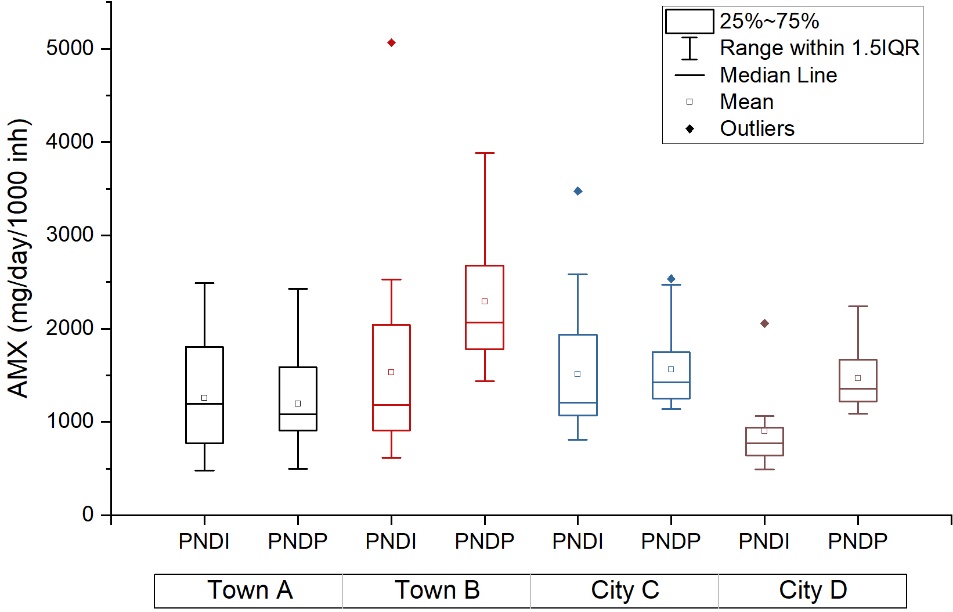 | 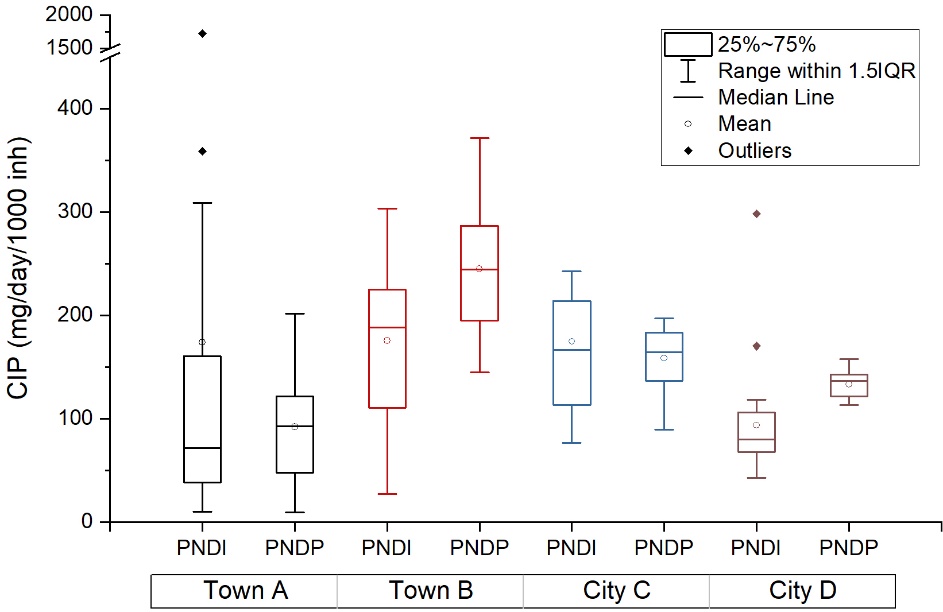 |
| --- | --- |
| 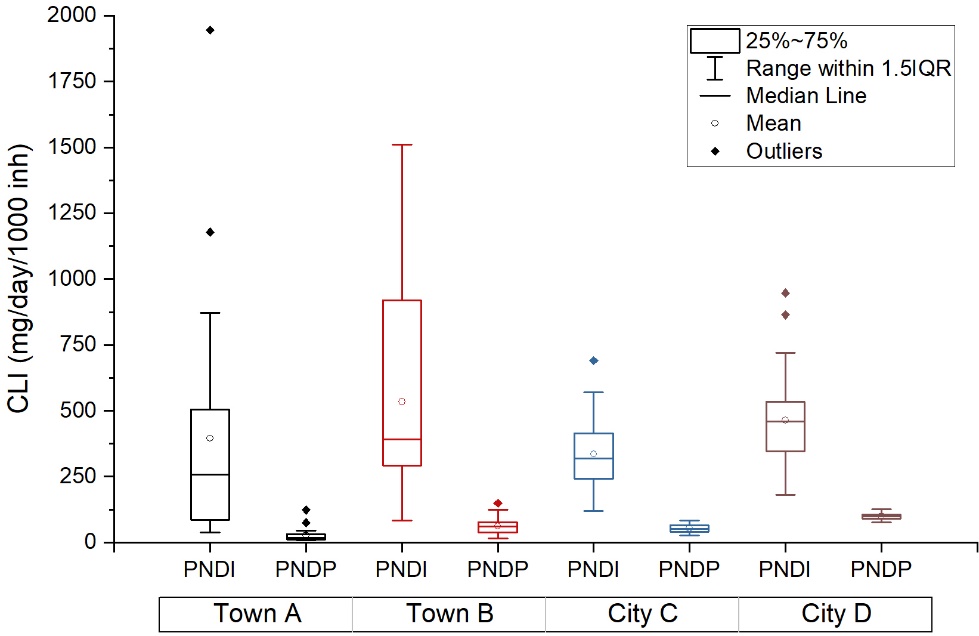 | 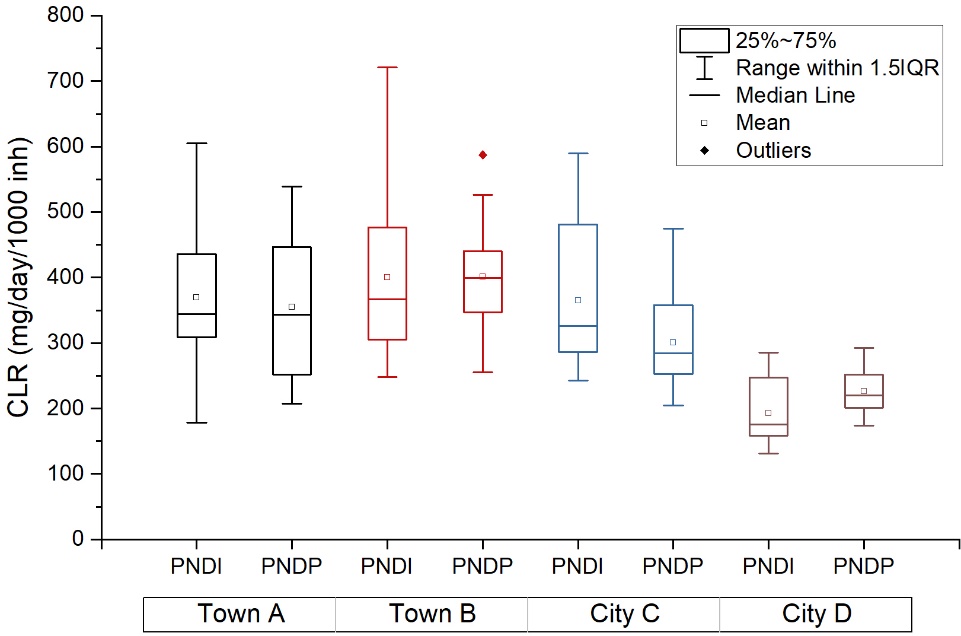 |

| 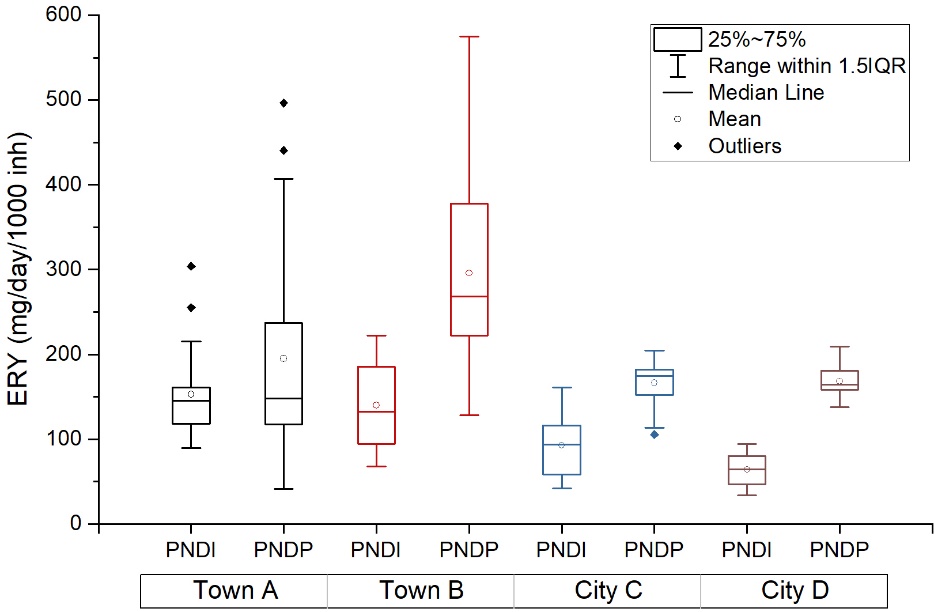 | 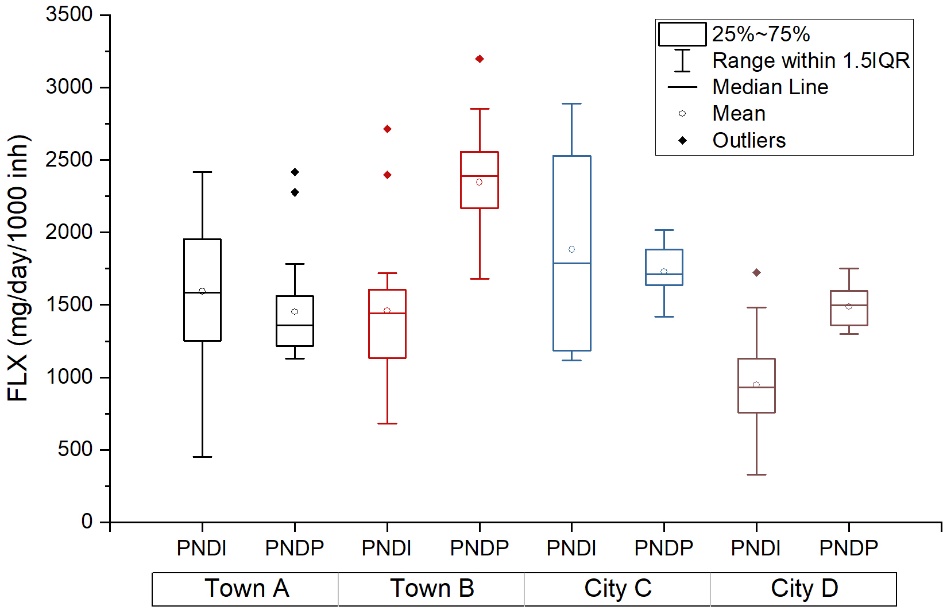 |
| --- | --- |
| 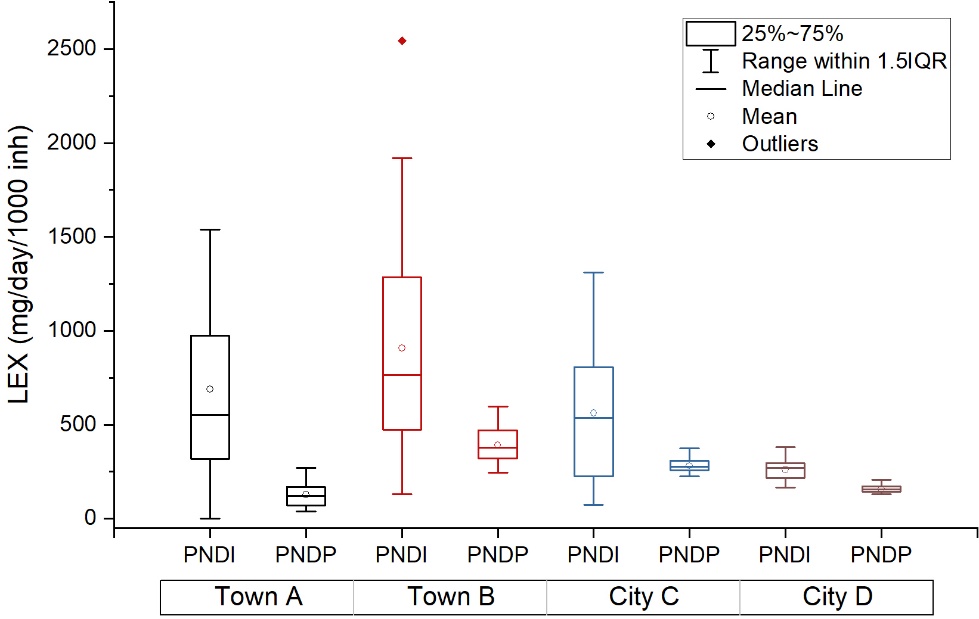 | 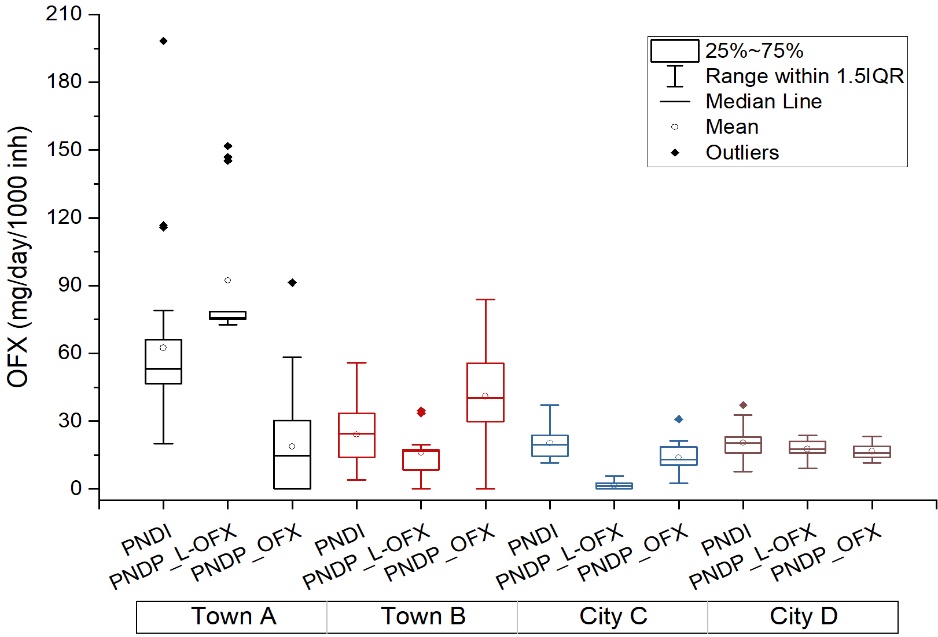 |

| 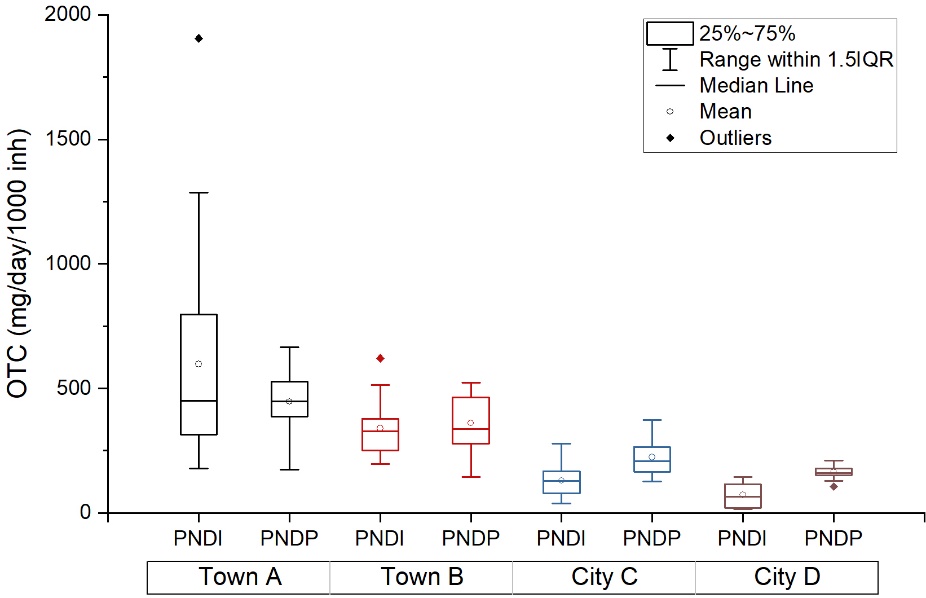 | 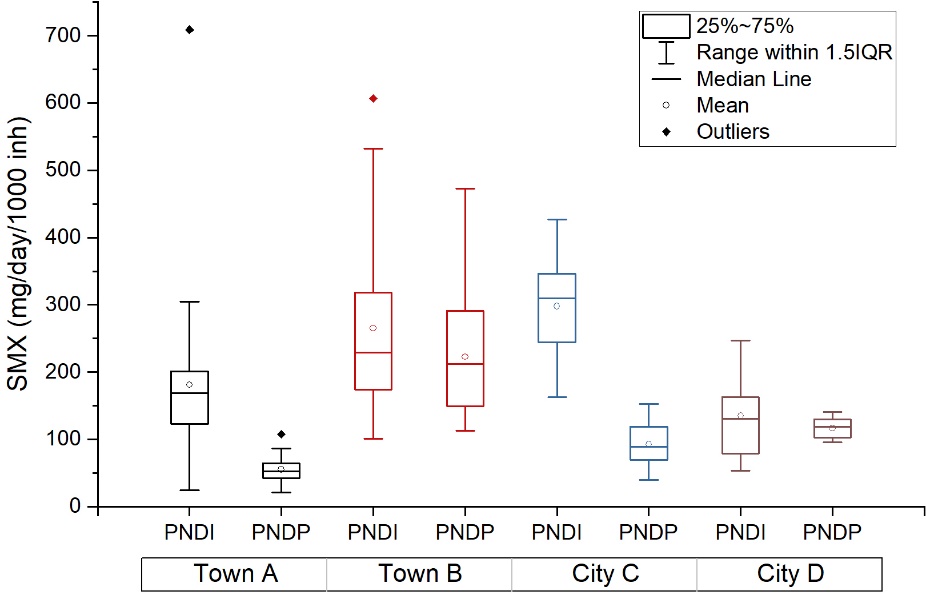 |
| --- | --- |
| 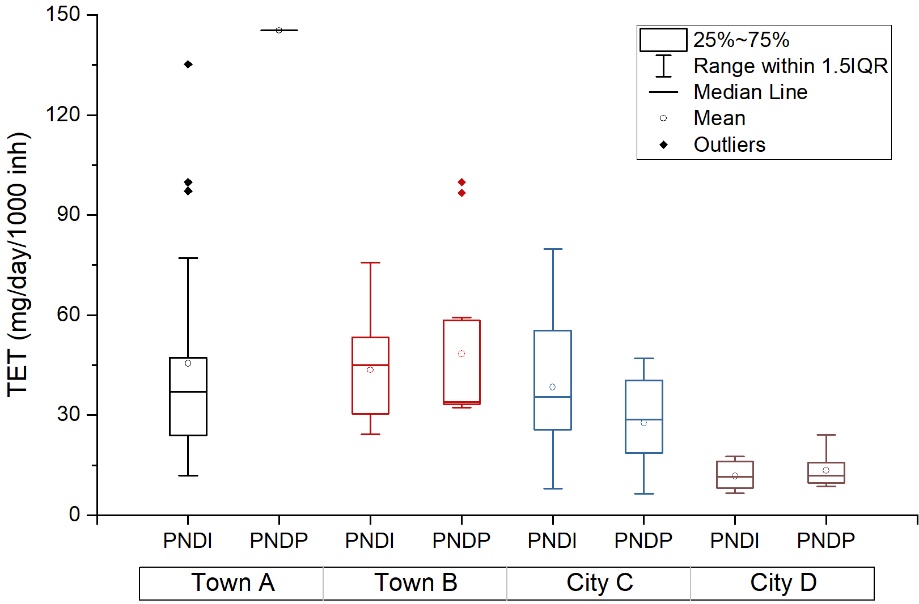 | 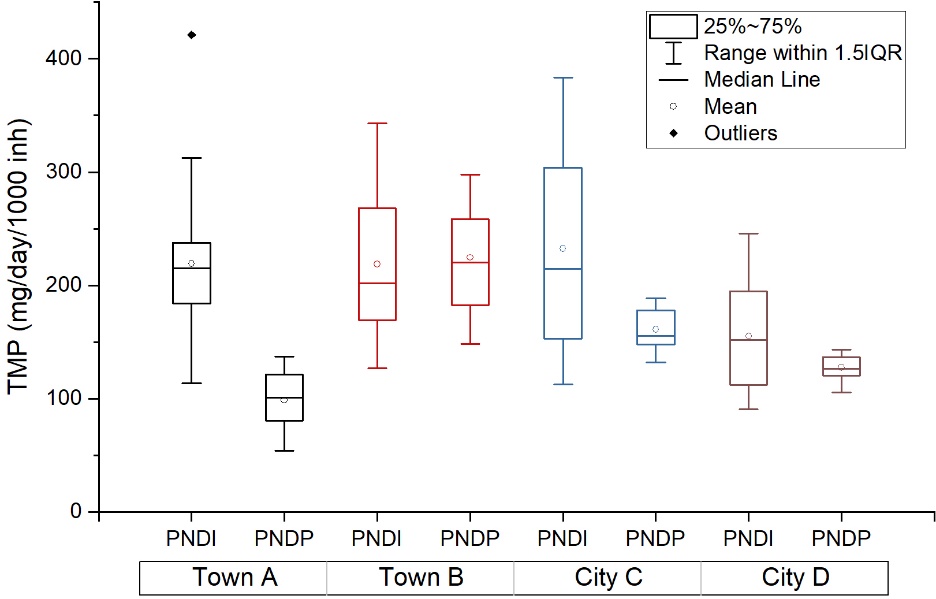 |
| Figure S4. Comparison of PNDI (Population-normalised daily intake) and PNDP (Population-normalised daily prescription) for individual antibiotics  at four sampling sites during April 2020 - March 2022. Monthly average data points were used to generate the box plot. | |

| 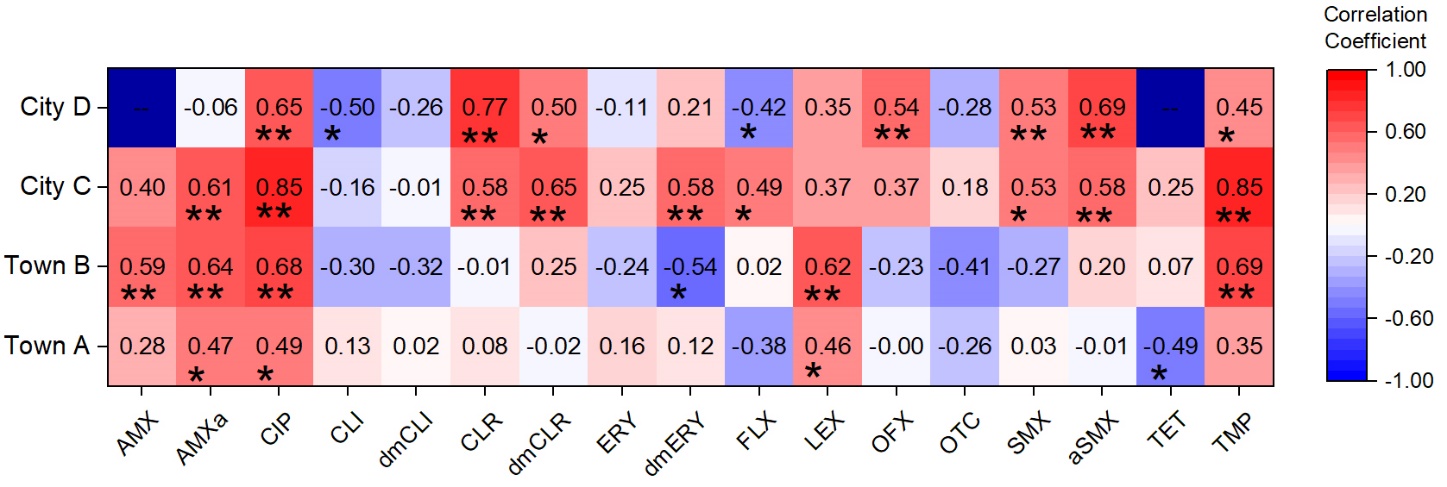 |
| --- |
| Figure S5. Heatmap showing the Spearman correlations between Covid-19 infection rates and  population-normalised daily intake (PNDI) of antibiotics. * indicates significance level at 0.05;  ** indicates significance level at 0.01. |

| 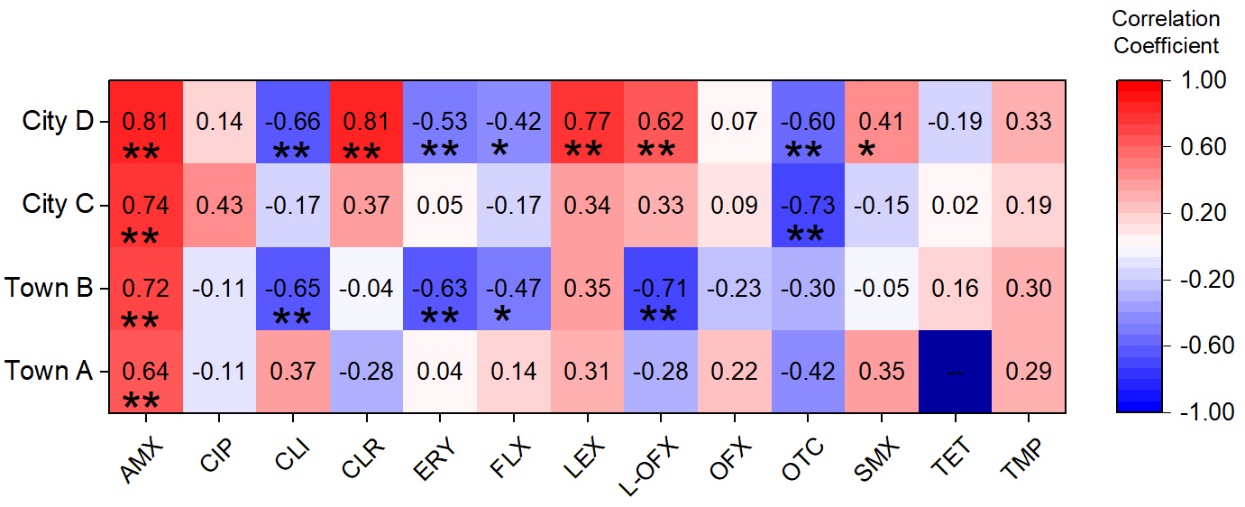 |
| --- |
| Figure S6. Heatmap showing the Spearman correlations between Covid-19 infection rates and population-normalised daily prescription (PNDP) of antibiotics. * indicates significance level at 0.05; ** indicates significance level at 0.01. |

| 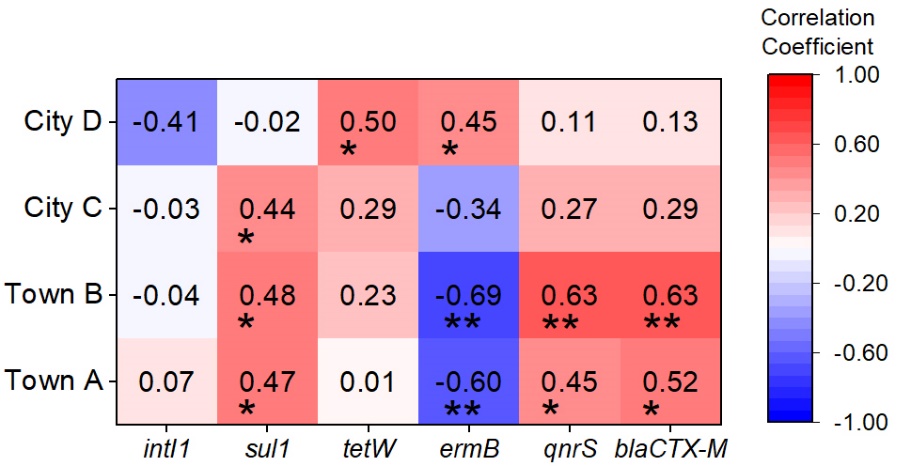 |
| --- |
| Figure S7. Heatmap showing the Spearman correlations between Covid-19 infection rates and ARG abundance (normalisation to bacterial *16S rRNA*). * indicates significance level at 0.05;  ** indicates significance level at 0.01. |

Table S1. Target antimicrobials and abbreviations, ordered by drug classes.

| **Drug class** | **Compounds** | **Parent/**  **Metabolite** | **Abbrev.** | **Drug class** | **Compounds** | **Parent/**  **Metabolite** | **Abbrev.** |
| --- | --- | --- | --- | --- | --- | --- | --- |
| **β-lactam** | Amoxicillin | Parent | AMX | **Quinolone** | Ciprofloxacin | Parent & active  metabolite | CIP |
| Flucloxacillin | Parent | FLX | Ofloxacin | Parent | OFX |
| Amoxicilloic acid | Metabolite | AMXa | Levofloxacin | Parent | L-OFX |
| Cefalexin | Parent | LEX | *****Ofloxacin-d3 | - | OFX-d3 |
| *****Amoxicillin-d4 | - | AMOX-d4 | **Cycline** | Oxytetracycline | Parent | OTC |
| *****Cefalexin-d5 | - | LEX-d5 | Tetracycline | Parent | TET |
| **Macrolide &**  **lincosamide** | Clarithromycin | Parent | CLR | *****Tetracycline-d6 | - | TET-d6 |
| Clindamycin | Parent | CLI | **Sulfonamide &**  **Trimethoprim** | Sulfamethoxazole | Parent | SMX |
| Erythromycin | Parent | ERY | N-acetyl sulfamethoxazole | Metabolite | aSMX |
| N-desmethyl erythromycin | Metabolite | dmERY | Trimethoprim | Parent | TMP |
| N-desmethyl clarithromycin | Metabolite | dmCLR | *****Sulfamethoxazole-d4 | - | SMX-d4 |
| N-desmethyl clindamycin | Metabolite | dmCLI | *****Trimethoprim-d9 | - | TMP-d9 |
| *****Clarithromycin-d3 | - | CLR-d3 |  |  |  |
| *****Erythromycin-13C,D3 | - | ERY-13C |  |  |  |

Table S2. Spearman correlations between PNDI (Population-normalised daily intake) and PNDP (Population-normalised daily prescription).

| PNDP  PNDI | AMX | CIP | CLI | CLR | ERY | FLX | LEX | L-OFX | OFX | OTC | SMX | TET | TMP |
| --- | --- | --- | --- | --- | --- | --- | --- | --- | --- | --- | --- | --- | --- |
| AMX | 0.33 |  |  |  |  |  |  |  |  |  |  |  |  |
| AMXa | 0.39 |  |  |  |  |  |  |  |  |  |  |  |  |
| CIP |  | 0.35 |  |  |  |  |  |  |  |  |  |  |  |
| CLI |  |  | -0.04 |  |  |  |  |  |  |  |  |  |  |
| dmCLI |  |  | 0.32 |  |  |  |  |  |  |  |  |  |  |
| CLR |  |  |  | 0.65 |  |  |  |  |  |  |  |  |  |
| dmCLR |  |  |  | 0.59 |  |  |  |  |  |  |  |  |  |
| ERY |  |  |  |  | 0.29 |  |  |  |  |  |  |  |  |
| dmERY |  |  |  |  | 0.20 |  |  |  |  |  |  |  |  |
| FLX |  |  |  |  |  | 0.07 |  |  |  |  |  |  |  |
| LEX |  |  |  |  |  |  | 0.35 |  |  |  |  |  |  |
| OFX |  |  |  |  |  |  |  | 0.66 | 0.05 |  |  |  |  |
| OTC |  |  |  |  |  |  |  |  |  | 0.64 |  |  |  |
| SMX |  |  |  |  |  |  |  |  |  |  | -0.12 |  |  |
| aSMX |  |  |  |  |  |  |  |  |  |  | 0.13 |  |  |
| TET |  |  |  |  |  |  |  |  |  |  |  | 0.59 |  |
| TMP |  |  |  |  |  |  |  |  |  |  |  |  | 0.17 |

* Light and dark green indicate significance level at 0.05 and 0.01, respectively.

| **Compounds** | PNDI vs ARGs | | | | | | PNDP vs ARGs | | | | | |
| --- | --- | --- | --- | --- | --- | --- | --- | --- | --- | --- | --- | --- |
| *intI1* | *sul1* | *tetW* | *ermB* | *qnrS* | *blaCTX-M* | *intI1* | *sul1* | *tetW* | *ermB* | *qnrS* | *blaCTX-M* | |
| *AMX | **0.34** | **0.39** | **0.53** | 0.22 | **0.44** | **0.45** |  |  |  |  |  | 0.21 | |
| CIP | **0.30** | **0.40** | **0.47** |  | **0.46** | **0.46** |  |  |  |  |  |  | |
| *CLI |  |  | -0.24 | -0.23 |  |  | -0.21 | -0.20 | **-0.31** | -0.21 | **-0.31** | **-0.31** | |
| CLR | **0.36** | **0.39** | **0.41** | **0.29** | **0.49** | **0.51** |  |  |  |  | 0.22 | **0.29** | |
| ERY | **0.30** | **0.27** | **0.33** |  | **0.39** | **0.48** |  |  |  |  |  |  | |
| LEX | **0.38** | **0.50** | **0.47** |  | **0.59** | **0.63** | 0.22 | 0.23 | **0.27** | **0.34** | 0.26 | **0.28** | |
| OTC |  |  |  | **-0.28** |  | 0.25 |  |  |  |  |  |  | |
| *SMX | 0.24 | 0.23 | **0.37** | **0.36** | 0.26 | 0.20 | **-0.35** | **-0.30** |  |  | -0.23 |  | |
| TET |  |  | **0.31** |  | 0.22 | **0.30** | **0.45** | **0.48** | 0.30 | **0.35** | **0.41** | **0.46** | |
| TMP |  | **0.41** | 0.22 |  | **0.29** | **0.31** | 0.20 |  |  | **0.36** |  |  | |

Table S3. Spearman correlations between antibiotics (PNDI & PNDP) and target genes.

*Metabolites were used for PNDI calculation and correlation analysis. Gene data were log10-transformed.

Empty cells indicate lack of significant correlations (p > 0.05). Cells with bold number indicate significance level at 0.01.
